# Supplementary material
Source: Springer Nature journal article supplement (https://www.springermedizin.de/resource/supplementary/12958_2013_1201_MOESM1_ESM.pdf/9567028)

**eCG Treatment**

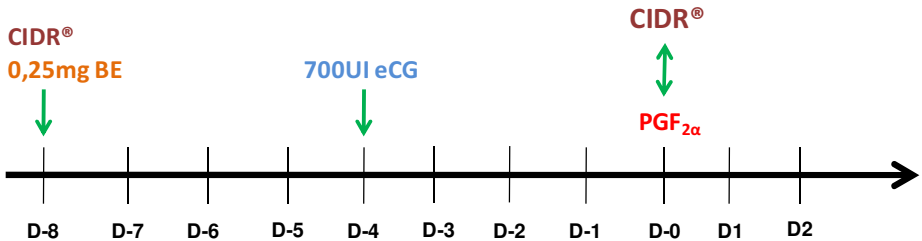

**FSH Treatment**

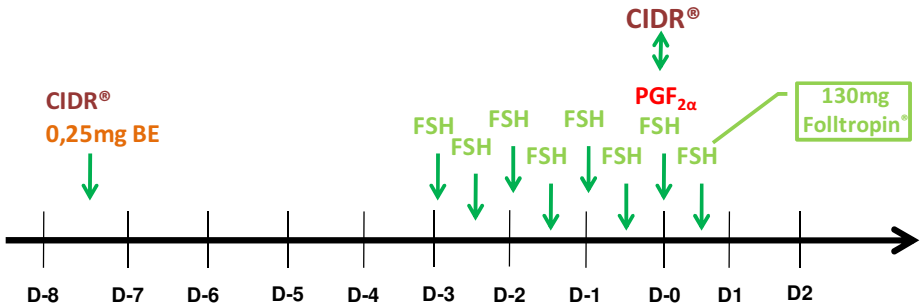

Supplement: MOESM1 [file 9567028]
